# Supplementary material for: Stability of the Virome in Lab- and Field-Collected Aedes albopictus Mosquitoes across Different Developmental Stages and Possible Core Viruses in the Publicly Available Virome Data of Aedes Mosquitoes
Source: PubMed Central journal article supplement (PMC7527137; doi:10.1128/msystems.00640-20), 2020-09-29

Alpha Diversity Measure

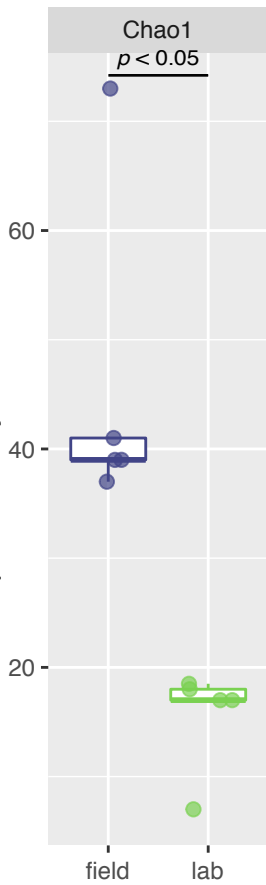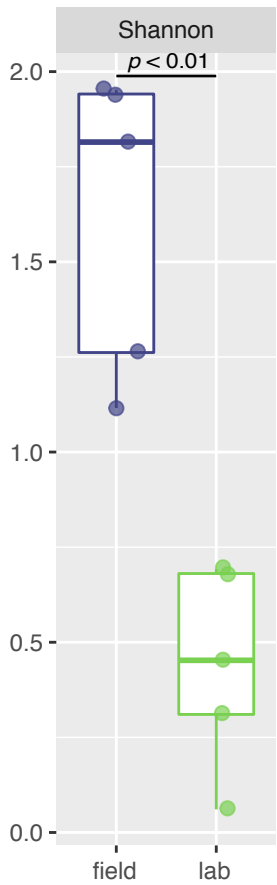

Supplement: mSystems.00640-20-sf001.pdf [file mSystems.00640-20-sf001.pdf]
